# Supplementary material for: Genomic Surveillance of Carbapenem-Resistant Klebsiella pneumoniae from a Major Public Health Hospital in Singapore
Source: PubMed Central journal article supplement (PMC9602435; doi:10.1128/spectrum.00957-22), 2022-09-06
Supplement: spectrum.00957-22-s0001.pdf [file spectrum.00957-22-s0001.pdf]

Supplementary figures

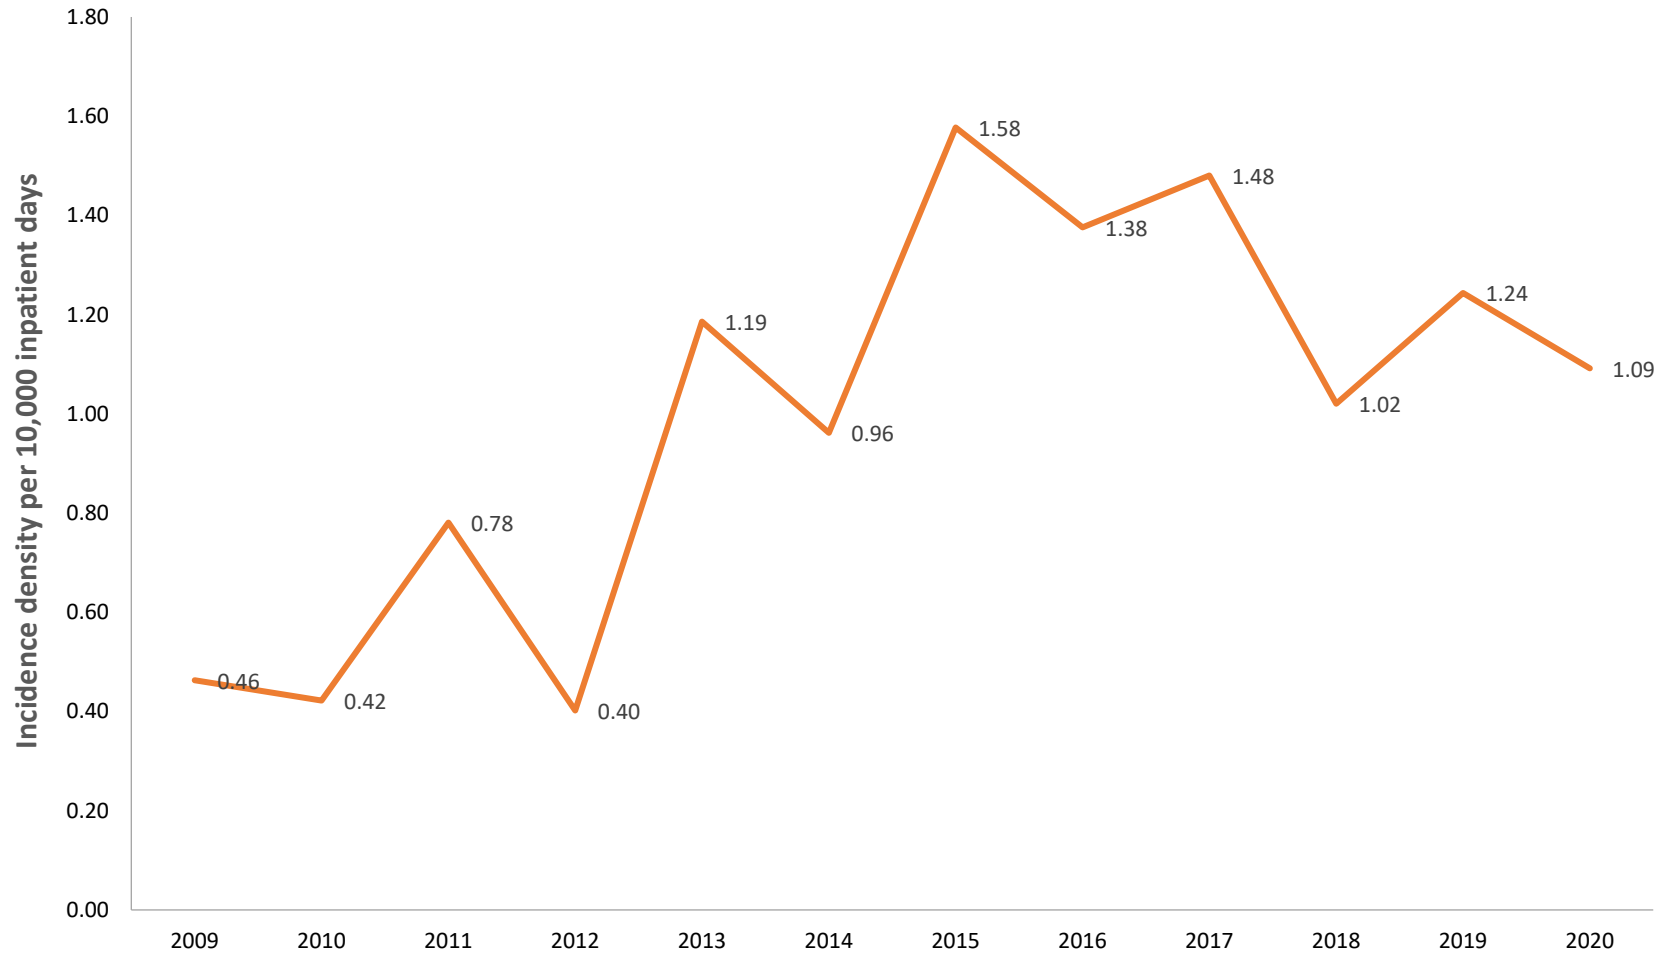

Figure 1. Incidence density trends of clinical carbapenem-resistant *K. pneumoniae* from 2009 – 2020

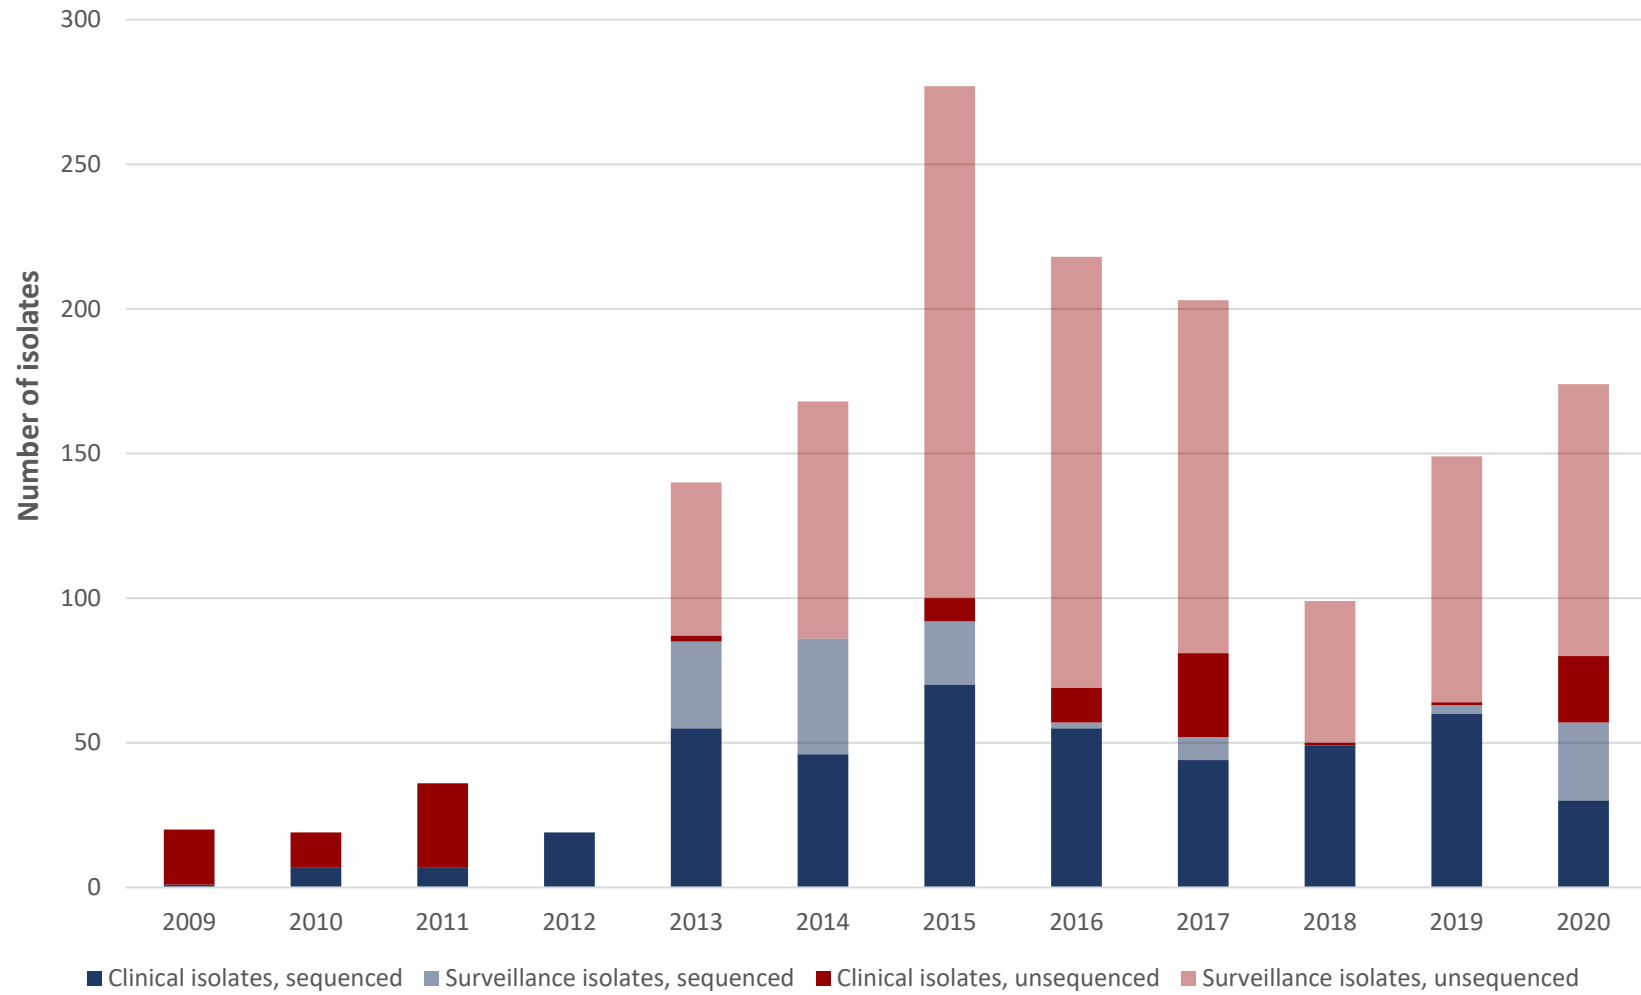

**Figure 2.** Number of carbapenem-resistant isolates collected and sequenced from 2009 – 2020

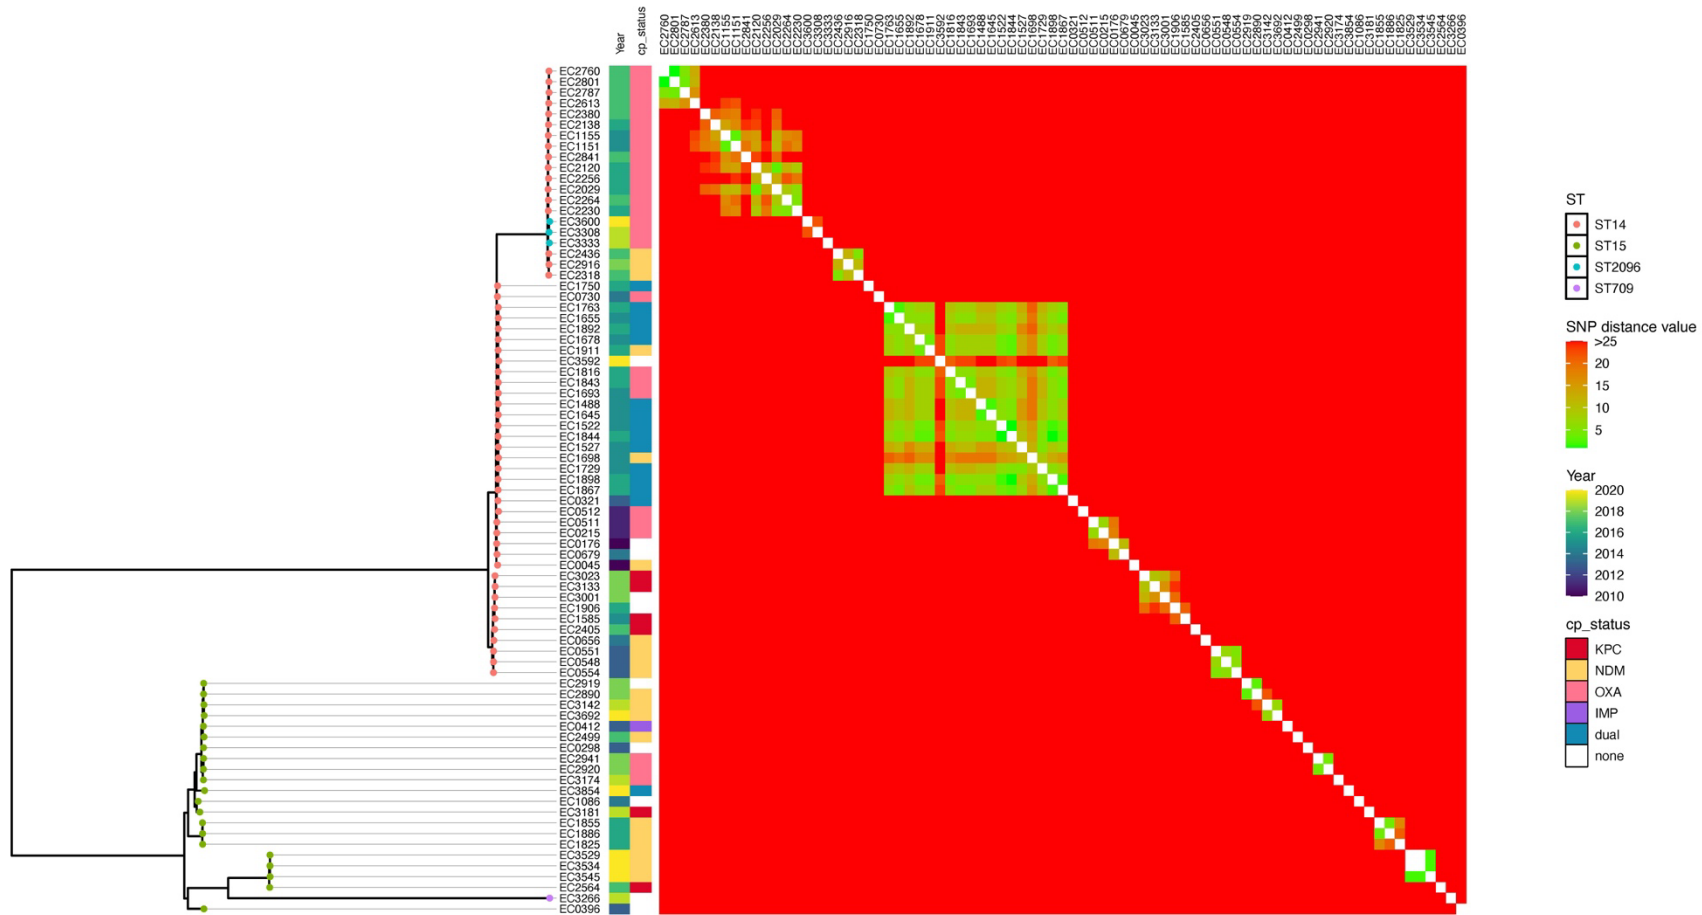

**Figure 3a** Core SNP phylogenetic tree of CG14/15 genomes with pairwise SNP distance matrix. The maximum-likelihood tree of CG14/15 was inferred from mapping 79 genomes to reference EC1155. The scale bar indicates the number of substitutions per site. CG, clonal group; SNP, single nucleotide polymorphism; ST, sequence type.

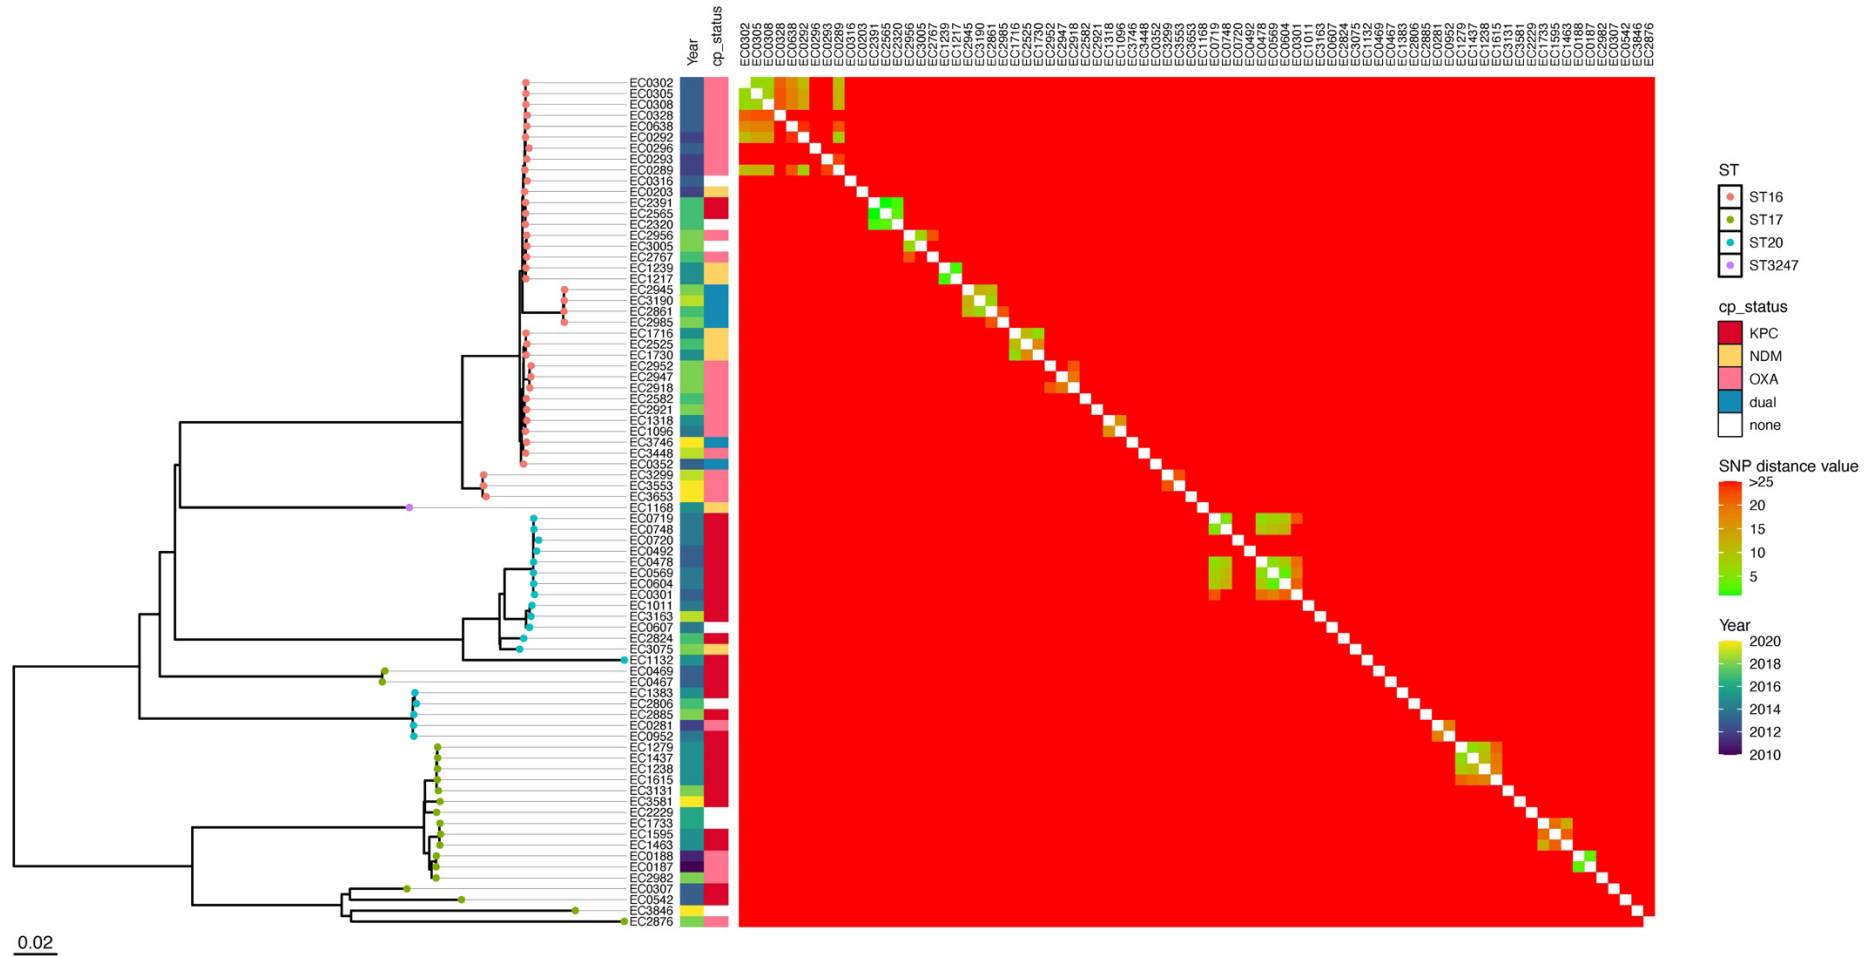

**Figure 3b.** Core SNP phylogenetic tree of CG17/20 genomes with pairwise SNP distance matrix. The maximum-likelihood tree of CG17/20 was inferred from mapping 78 genomes to reference EC0720. The scale bar indicates the number of substitutions per site. CG, clonal group; SNP, single nucleotide polymorphism; ST, sequence type.

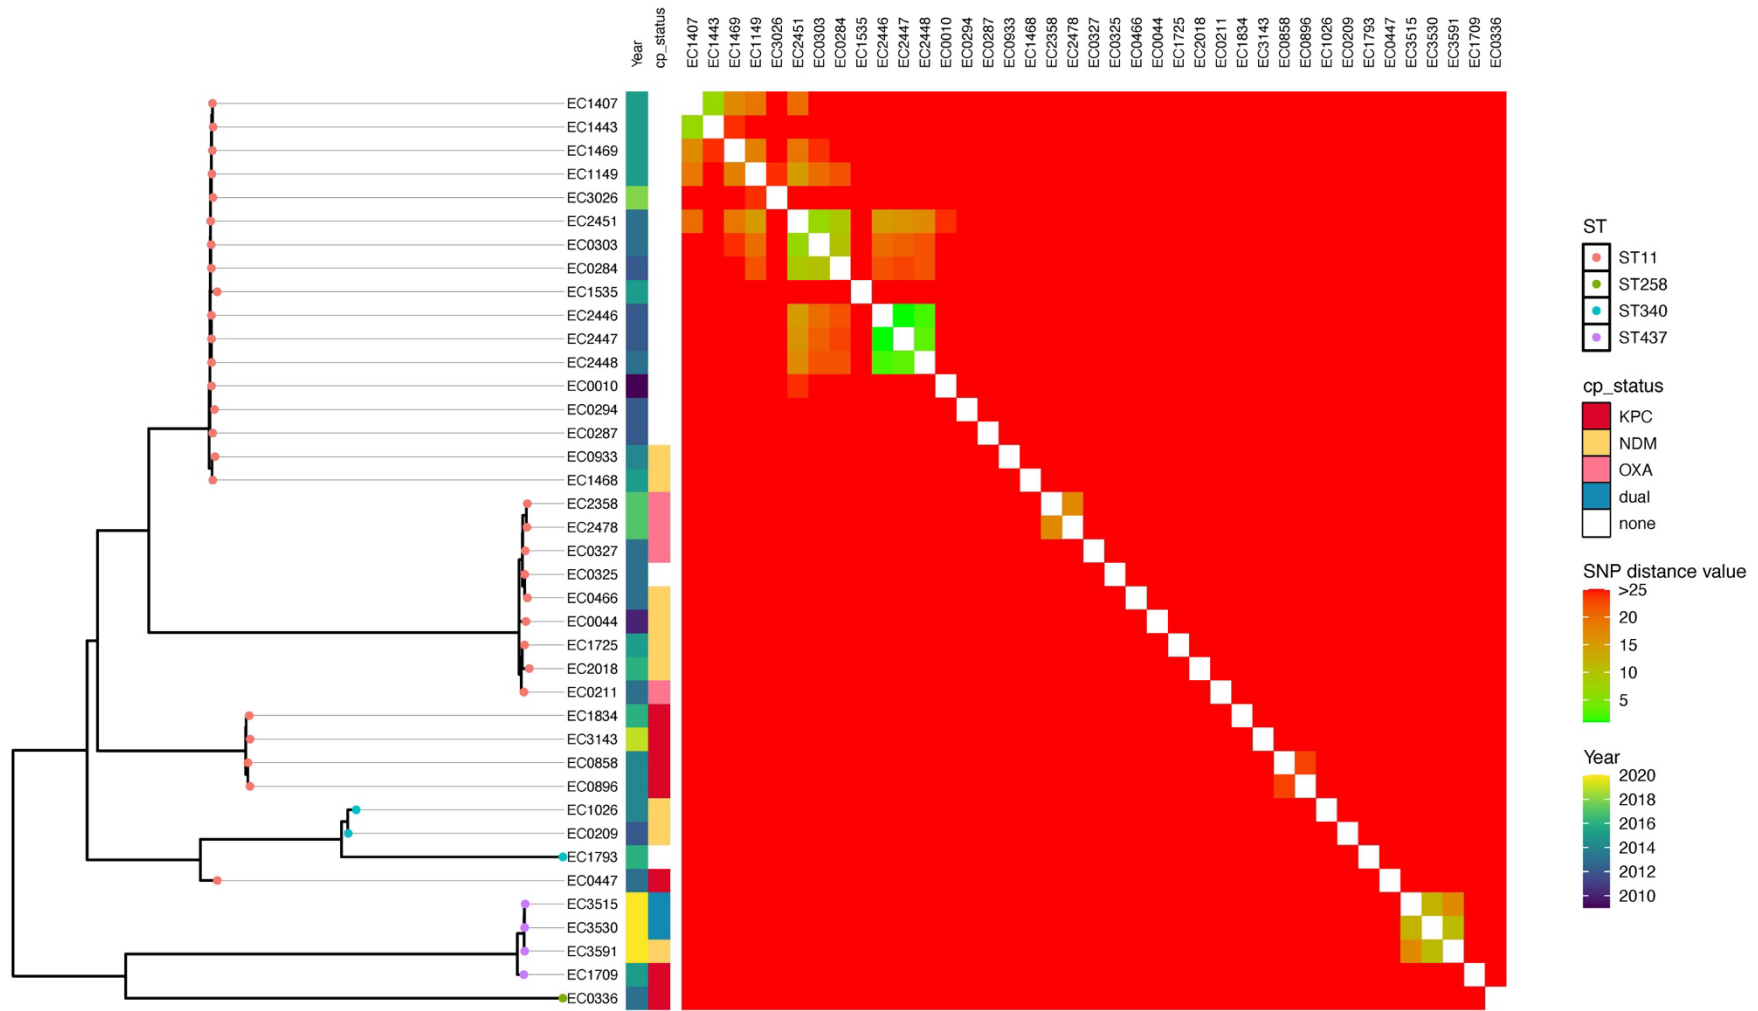

0.03

**Figure 3c.** Core SNP phylogenetic tree of CG258 genomes with pairwise SNP distance matrix. The maximum-likelihood tree of CG258 was inferred from mapping 39 genomes to reference EC3204. The scale bar indicates the number of substitutions per site. CG, clonal group; SNP, single nucleotide polymorphism; ST, sequence type.

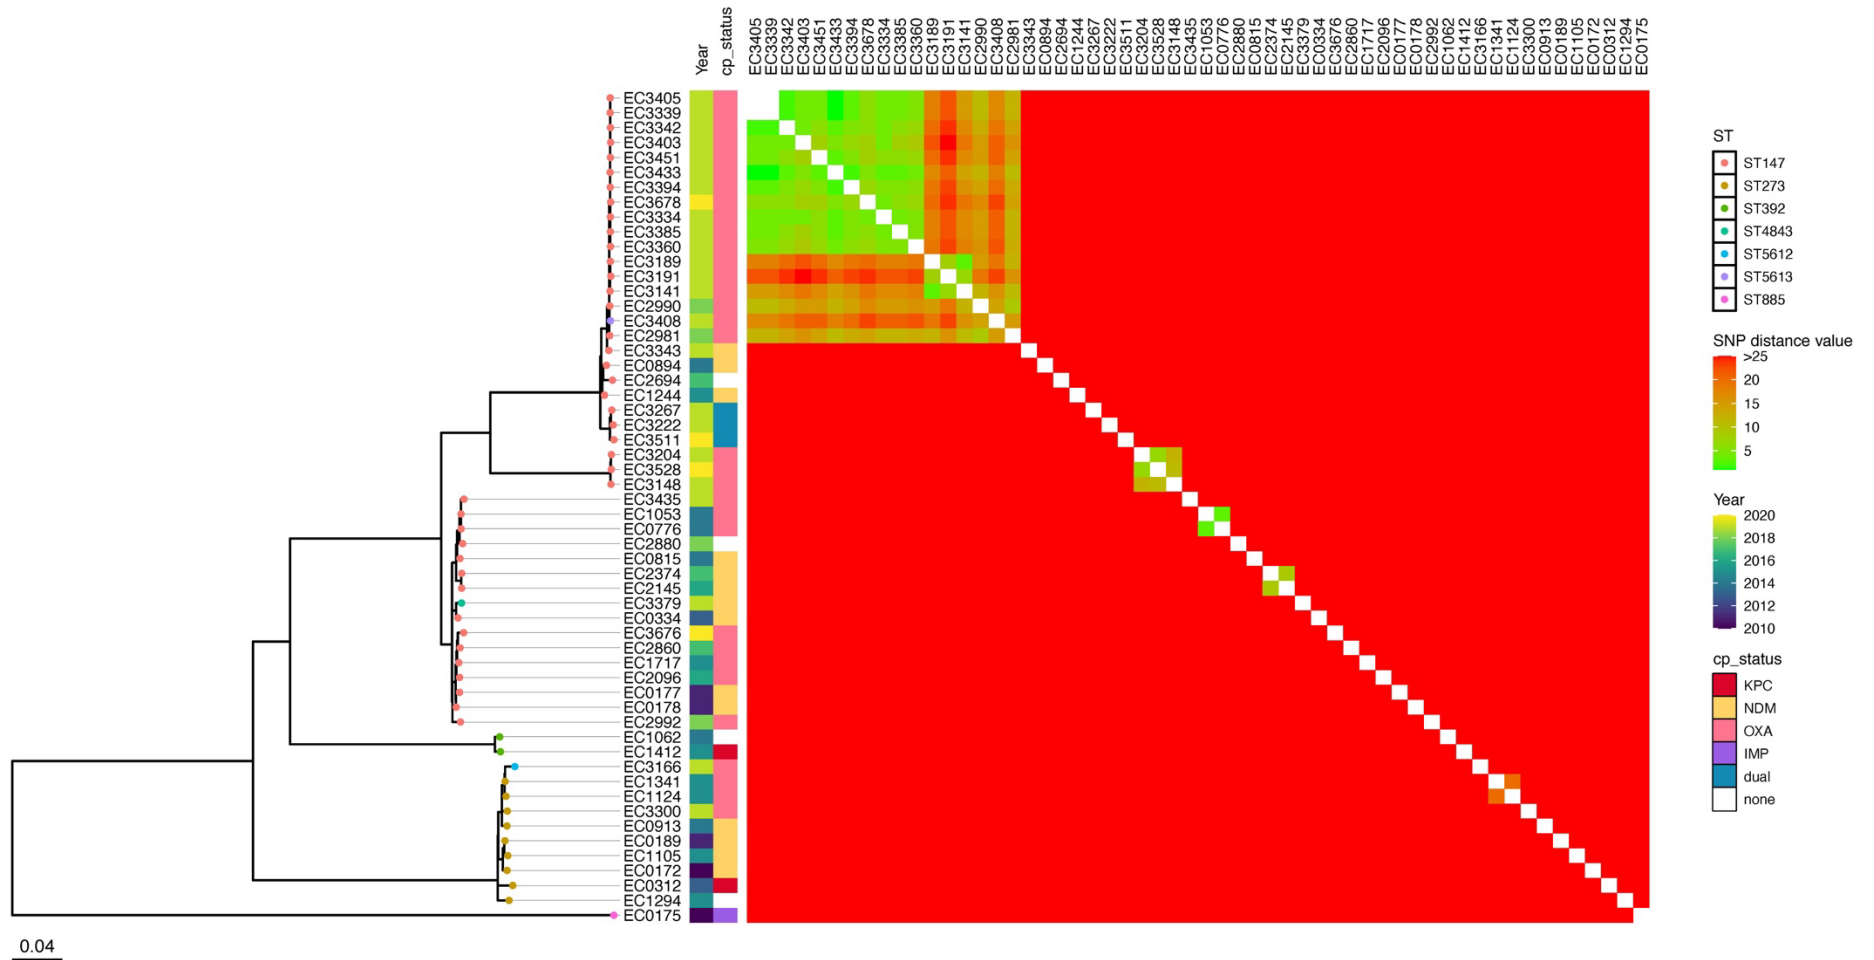

**Figure 3d.** Core SNP phylogenetic tree of CG147 genomes with pairwise SNP distance matrix. The maximum-likelihood tree of CG147 was inferred from mapping 56 genomes to reference EC0325. The scale bar indicates the number of substitutions per site. CG, clonal group; SNP, single nucleotide polymorphism; ST, sequence type.

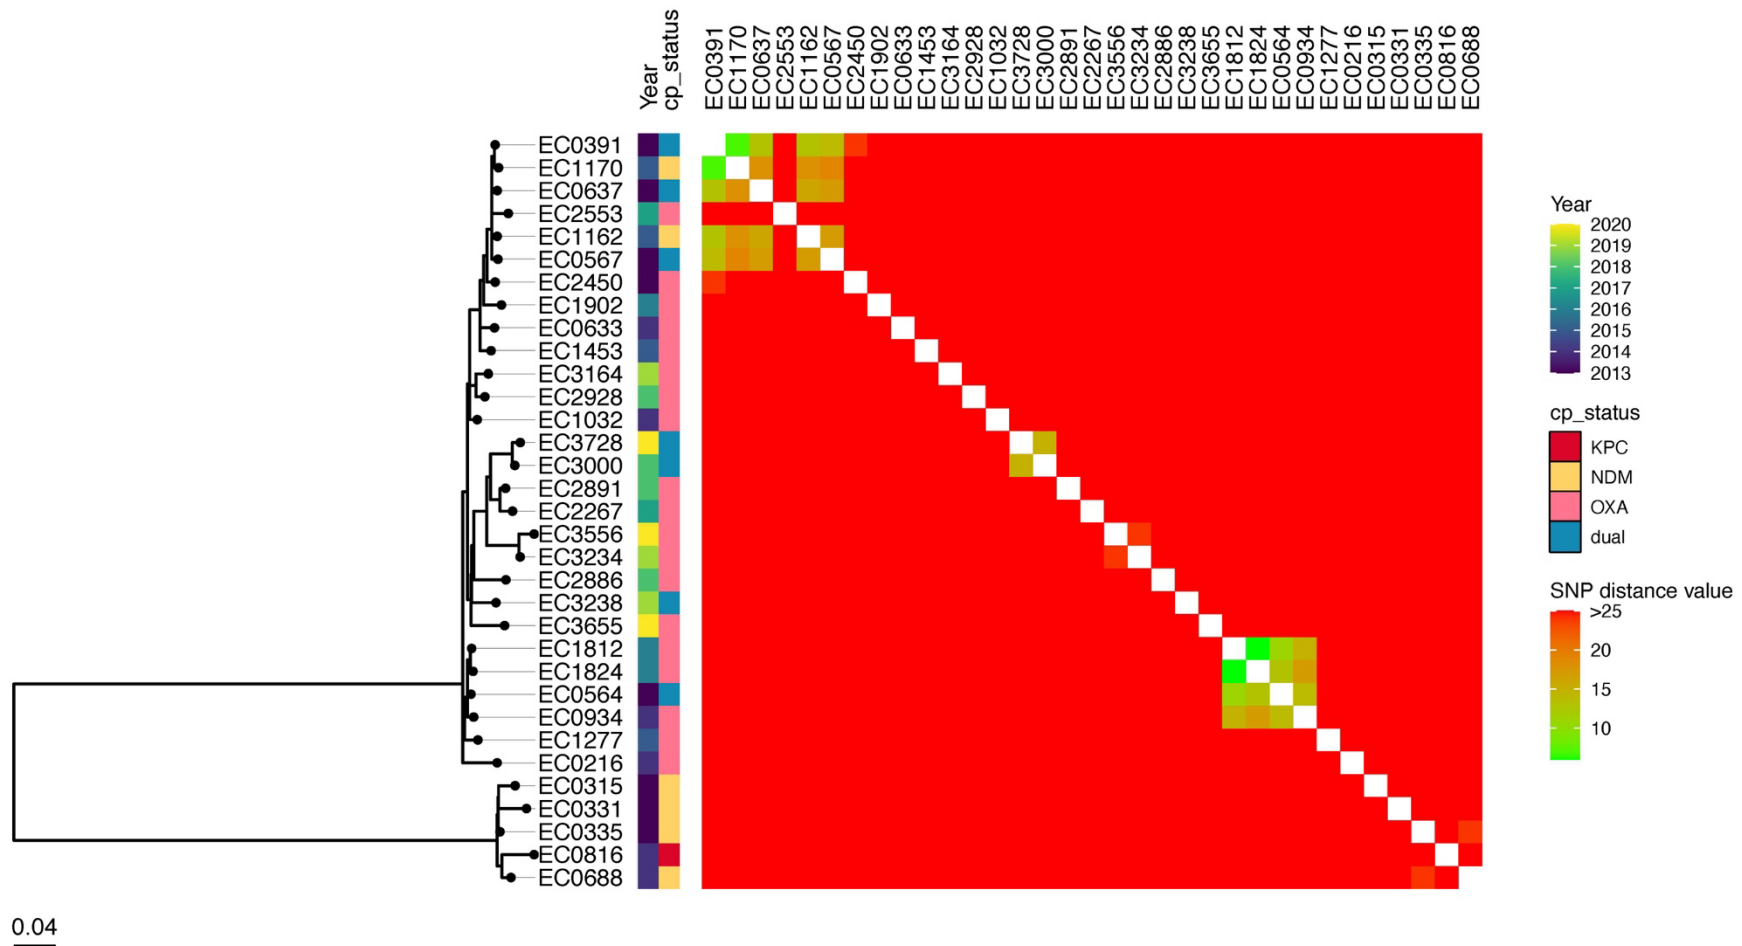

**Figure 3e.** Core SNP phylogenetic tree of ST231 genomes with pairwise SNP distance matrix. The maximum-likelihood tree of ST231 was inferred from mapping 33 genomes to reference EC2886. The scale bar indicates the number of substitutions per site. CG, clonal group; SNP, single nucleotide polymorphism; ST, sequence type.
